# Supplementary material for: Prediction and Identification of Antioxidant Peptides in Potato Protein Hydrolysate
Source: Hindawi journal article supplement (doi:10.1155/2020/8889555), 2020-09-24
Supplement: f1 [file 8889555.f1.doc]

**Supplementary Material**

**Table S1. Amino acid composition** of fractions of PPH isolated using gel filtration* and ammonium sulfate precipitation

| AA(%) | PPH | Peak 1 | Peak 2 | Peak 3 | P30 | P50 | P70 | P90 | PR |
| --- | --- | --- | --- | --- | --- | --- | --- | --- | --- |
| Asp | 9.30 | 10.64 | 8.06 | 3.90 | 6.62 | 6.44 | 8.93 | 8.95 | 6.74 |
| Glu | 9.33 | 10.32 | 9.15 | 3.28 | 5.99 | 5.35 | 7.37 | 8.24 | 10.69 |
| Ser | 4.18 | 3.82 | 3.86 | 2.58 | 2.98 | 2.53 | 3.27 | 3.20 | 6.38 |
| His | 1.46 | 0.999 | 1.46 | 2.53 | 1.29 | 1.07 | 1.22 | 1.14 | 1.41 |
| Gly | 3.58 | 3.82 | 3.41 | 2.23 | 3.03 | 2.76 | 3.48 | 3.14 | 5.68 |
| Thr | 4.58 | 4.36 | 4.81 | 2.41 | 3.21 | 2.90 | 3.75 | 3.83 | 4.52 |
| Arg | 3.12 | 3.61 | 2.2 | 1.68 | 2.35 | 2.09 | 2.46 | 2.28 | 3.94 |
| Ala | 4.10 | 3.93 | 4.53 | 2.15 | 2.80 | 2.25 | 2.84 | 3.10 | 5.45 |
| Tyr | 1.58 | 1.81 | 3.69 | 8.86 | 2.95 | 3.10 | 3.14 | 2.27 | 2.15 |
| Cys | 0.442 | 0.273 | 0.358 | 0.162 | 1.09 | 0.81 | 0.97 | 1.11 | 1.00 |
| Val | 4.37 | 4.87 | 4.92 | 2.45 | 0.14 | 3.41 | 4.64 | 4.85 | 4.70 |
| Met | 1.77 | 1.32 | 2.38 | 1.62 | 2.26 | 1.71 | 2.36 | 2.61 | 2.50 |
| Phe | 4.36 | 3.26 | 4.84 | 7.12 | 4.08 | 3.84 | 4.86 | 4.62 | 2.45 |
| Ile | 3.46 | 3.89 | 4.3 | 2.54 | 2.84 | 2.65 | 3.38 | 2.97 | 1.57 |
| Leu | 7.43 | 6.70 | 8.61 | 4.18 | 5.84 | 5.41 | 6.96 | 6.92 | 5.23 |
| Lys | 5.25 | 7.27 | 3.44 | 1.96 | 3.26 | 2.91 | 3.87 | 3.96 | 3.66 |
| Pro | 3.17 | 3.69 | 2.85 | 2.10 | 4.04 | 5.75 | 6.25 | 4.52 | 3.11 |

*Reprinted with permission from J. Agric. Food Chem. 58, 15, 8825-8832. Copyright © 2010 American Chemical Society."

**Figure S1. Cumulative contributing rate of principal component**
